# Supplementary material for: Cellular conditions of weakly chelated magnesium ions strongly promote RNA stability and catalysis
Source: PubMed Central journal article supplement (PMC5984629; doi:10.1038/s41467-018-04415-1), 2018-06-01
Supplement: 41467_2018_4415_MOESM3_ESM.pdf [file 41467_2018_4415_MOESM3_ESM.pdf]

## **Description of Additional Supplementary Files:**

File Name: Supplementary Dataset 1

Description: This dataset describes all of our experimental reaction conditions.
